## Retraction of: LINC00514 drives osteosarcoma progression through sponging microRNA-708 and consequently increases URGCP expression

Dapeng Yu<sup>1,\*</sup>, Xiangyan Xu<sup>2,\*</sup>, Sufen Li<sup>3</sup>, Kai Zhang<sup>4</sup>

<sup>1</sup>Department of Spine Surgery, Shandong Provincial ENT Hospital, Shandong Provincial ENT Hospital Affiliated to Shandong University, Ji'nan 250022, Shandong, China

<sup>2</sup>Department of Traumatic Orthopedics, Shandong Provincial ENT Hospital, Shandong Provincial ENT Hospital Affiliated to Shandong University, Ji'nan 250022, Shandong, China

<sup>3</sup>Orthopedic and Soft Tissue Surgery, Shandong Cancer Hospital and Institute, Shandong First Medical University and Shandong Academy of Medical Sciences, Ji'nan 250117, Shandong, China

<sup>4</sup>Department of Orthopedics, Shandong Provincial Third Hospital, Ji'nan 250031, Shandong, China

\*Co-first authors

**Correspondence to:** Kai Zhang; email: [zhangkai\\_spth@163.com](mailto:zhangkai_spth@163.com)

**Keywords:** long noncoding RNA, osteosarcoma, microRNA

**Original article:** [Aging \(Albany NY\) 2020; 12: pp 6793 – 6807](#)

PMID: [32325430](#)

PMCID: [PMC7202513](#)

doi: [10.18632/aging.103043](#)

**This article has been retracted:** Aging has completed its investigation of this paper. Several concerns were raised about this paper, including overlap with unrelated papers from different institutions. We found that two panels in **Figure 7G** “The migratory and invasive abilities of the aforementioned cells were assessed by transwell migration and invasion assays” are duplications of Figure 1H published earlier in an unrelated paper [1] and Figure 6C published in a second unrelated paper [2]. In addition, **Figure 8A** “Representative image of subcutaneous tumor xenografts collected from the sh-LINC00514 and sh-NC groups” contains the same distinctively scratched ruler that was used to measure xenograft tumors in three other papers from unrelated teams of authors [3, 4, 5], which have already been retracted. Moreover, we discovered that the formats of two of those papers [4, 5] and the discussed paper are nearly identical, with some figures being almost indistinguishable. The Scientific Integrity office at Aging contacted the authors, but the authors did not respond to requests to clarify, and the paper was retracted based on an Editorial decision. The Scientific Integrity office also notified the authors’ Institutions about this retraction and added their names to an Editorial Warning list.

### REFERENCES

1. Zhang S, Long J, Hu Y. Long noncoding RNA LINC00205 enhances the malignant characteristics of retinoblastoma by acting as a molecular sponge of microRNA-665 and consequently increasing HMGB1 expression. *Biochem Biophys Res Commun.* 2020 May 28;526(2):396-403. doi: 10.1016/j.bbrc.2020.03.083. Epub 2020 Mar 26. PMID: 32223925
2. Qin C, Jin L, Li J, Zha W, Ding H, Liu X, Zhu X. Long Noncoding RNA LINC02163 Accelerates Malignant Tumor Behaviors in Breast Cancer by Regulating the MicroRNA-511-3p/HMGA2 Axis. *Oncol Res.* 2020 Dec 10;28(5):483-495. doi: 10.3727/096504020X15928179818438. Epub 2020 Jun 22. PMID: 32571448; PMCID: PMC7751230
3. Xing S, Zhang Y, Zhang J. LINC01224 Exhibits Cancer-Promoting Activity in Epithelial Ovarian Cancer Through microRNA-

485-5p-Mediated PAK4 Upregulation. *Onco Targets Ther.* 2020 Jun 16;13:5643-5655. doi: 10.2147/OTT.S254662. Retraction in: *Onco Targets Ther.* 2021 Sep 30;14:4939-4940. doi: 10.2147/OTT.S341523. PMID: 32606778; PMCID: PMC7305856

4. Yang F, Lei P, Zeng W, Gao J, Wu N. Long Noncoding RNA *LINC00173* Promotes the Malignancy of Melanoma by Promoting the Expression of IRS4 Through Competitive Binding to microRNA-493. *Cancer Manag Res.* 2020 May 5;12:3131-3144. doi: 10.2147/CMAR.S243869. Retraction in: *Cancer Manag Res.* 2021 Sep 29;13:7507-7508. doi: 10.2147/CMAR.S341519. PMID: 32440211; PMCID: PMC7211300
5. Zhang C, Wu S, Song R, Liu C. Long noncoding RNA NR2F1-AS1 promotes the malignancy of non-small cell lung cancer via sponging microRNA-493-5p and thereby increasing ITGB1 expression. *Aging (Albany NY).* 2020 Aug 7;13(5):7660-7675. doi: 10.18632/aging.103564. Epub 2020 Aug 7. PMID: 32784268; PMCID: PMC7993723. Retraction in: *Aging (Albany NY).* 2024 Jul 31;16(14):11477-11478. doi: 10.18632/aging.206050
